# Supplementary material for: Engineering microtubular SnO2 architecture assembled by interconnected nanosheets for high lithium storage capacity
Source: Royal Society of Chemistry journal article supplement (doi:10.1039/c5ra02452h), 2015-01-01

## **Electronic supplementary information (ESI)**

### **Engineering microtubular SnO<sub>2</sub> architecture assembled by interconnected nanosheets for high lithium storage capacity**

**Xinyu Zhao<sup>a,b</sup>, Bing Liu<sup>a</sup>, and Minhua Cao<sup>\*a</sup>**

<sup>a</sup>Key Laboratory of Cluster Science, Ministry of Education of China, Beijing Key Laboratory of Photoelectronic/Electrophotonic Conversion Materials, Department of Chemistry, Beijing Institute of Technology, Beijing 100081, P. R. China. Fax: +86-10-68912631; Tel: +86-10-68918468; E-mail: caomh@bit.edu.cn

<sup>b</sup>School of Petrochemical Engineering, Shenyang University of Technology, Liaoyang 111003, P.R. China

**Fig. S1** The SAED pattern of hollow SnO<sub>2</sub> microtubes.

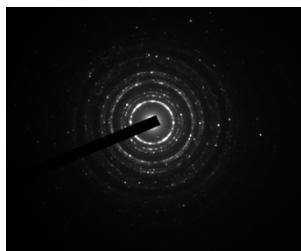

**Table S1** The detailed experimental conditions.

| Experiment | Materials                                                            | Quantity                 | Temperature,<br>time |
|------------|----------------------------------------------------------------------|--------------------------|----------------------|
| I          | NH <sub>4</sub> F + cotton                                           | 14 mmol + 300 mg         | 180 °C, 24 h         |
| II         | SnCl <sub>2</sub> ·2H <sub>2</sub> O + cotton                        | 7 mmol + 300 mg          | 180 °C, 24 h         |
| III        | NH <sub>4</sub> F + SnCl <sub>2</sub> ·2H <sub>2</sub> O +<br>cotton | 7 mmol + 14 mmol+ 300 mg | 180 °C, 24 h         |

**Fig. S2** SEM images of the cotton treated by NH<sub>4</sub>F at the temperature of 180 °C.

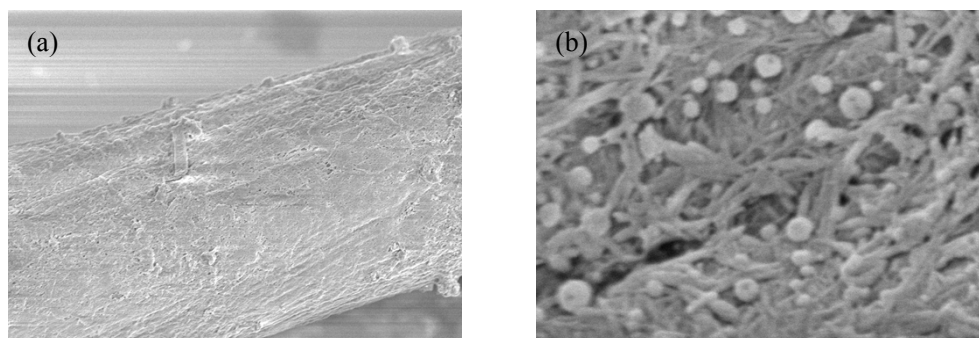

**Fig. S3** SEM image of the nanoparticle film.

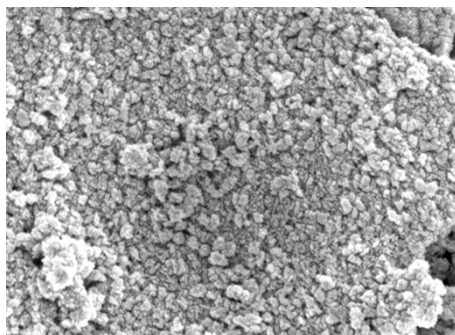

**Fig. S4** SEM images of the samples obtained with different concentrations of  $\text{SnCl}_2 \cdot 2\text{H}_2\text{O}$ . (a,e: 1 mmol; b,f: 3 mmol; c,g: 5 mmol; d,h: 15 mmol).

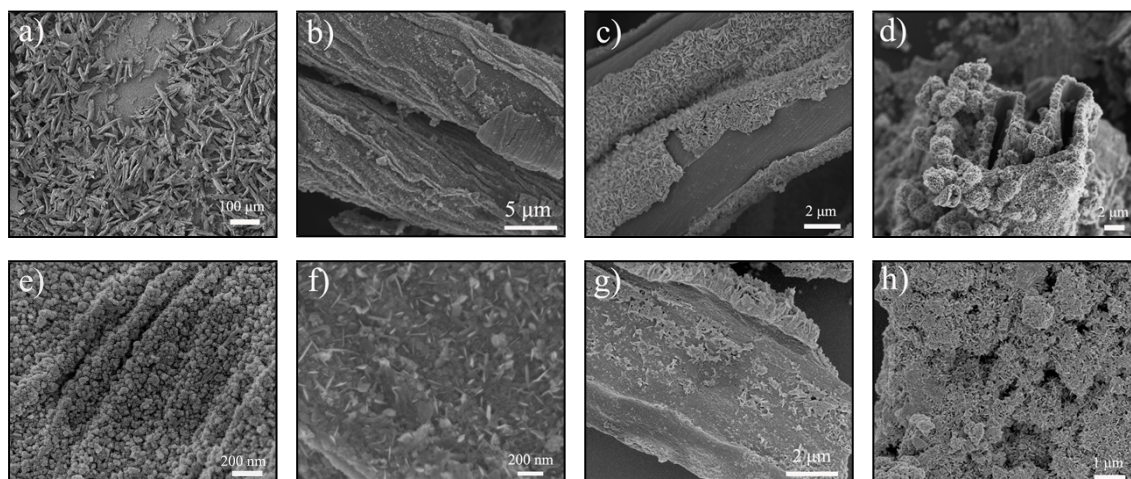

**Table S2** The pH value of the solution before and after hydrothermal treatment.

| Experiment | Materials                                                                | Before Hydrothermal treatment | After Hydrothermal treatment |
|------------|--------------------------------------------------------------------------|-------------------------------|------------------------------|
| I          | $\text{NH}_4\text{F}$ +Water                                             | 5.48                          | 5.50                         |
| II         | $\text{SnCl}_2 \cdot 2\text{H}_2\text{O}$ +Water                         | 1.65                          | 1.00                         |
| III        | $\text{SnCl}_2 \cdot 2\text{H}_2\text{O}$ + $\text{NH}_4\text{F}$ +Water | 2.61                          | 2.19                         |

**Fig. S5** The TGA curve of the hollow  $\text{SnO}_2$  microtubes (Red line) and cotton (Black line).(the inset is TGA curve of hollow  $\text{SnO}_2$  microtubes in the narrow range of 96.5 to 100 %)

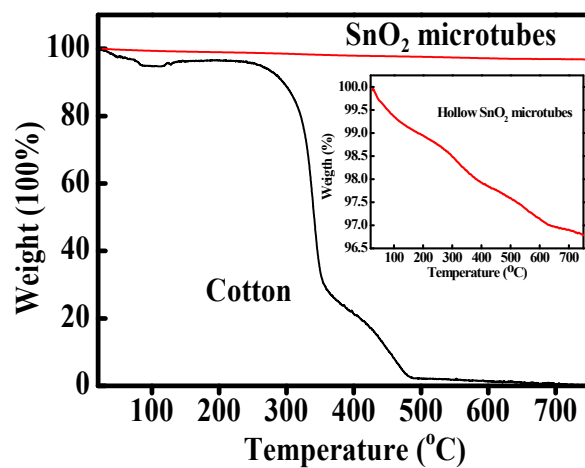

**Fig. S6** (a) SEM image and (b) XRD pattern of commercial  $\text{SnO}_2$ .

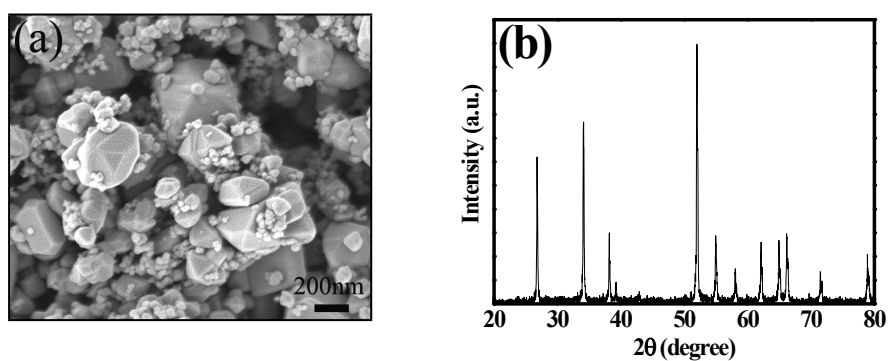

**Fig. S7** SEM images of the hollow  $\text{SnO}_2$  microtube electrode after 50 cycles of charging and discharging processes at a rate of 1C.

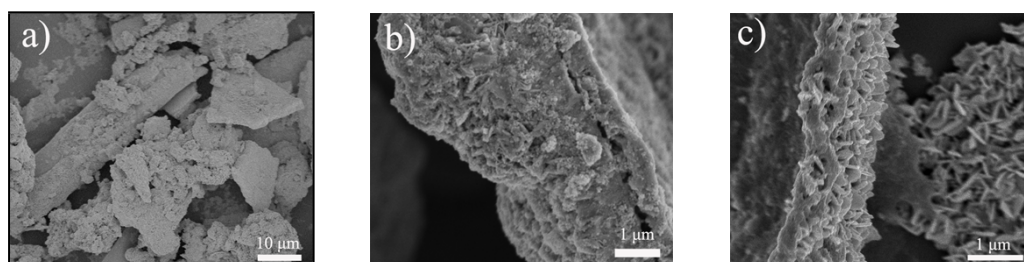

**Fig. S8** Cycling performance of hollow SnO<sub>2</sub> microtubes and commercial SnO<sub>2</sub> power between 50 to 100 cycles at a rate of 1C.

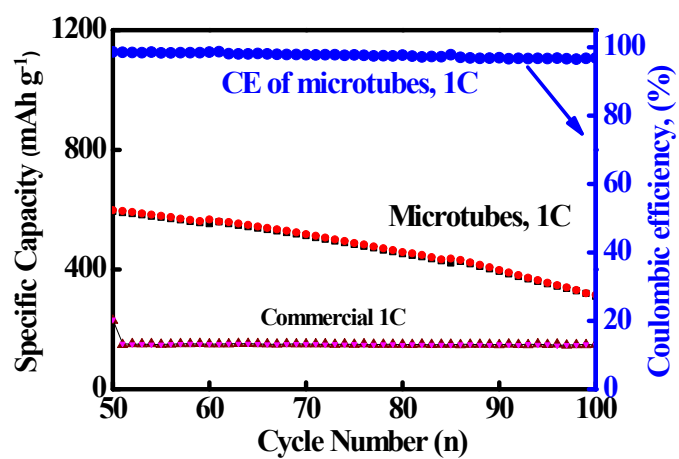

Supplement: c5ra02452h1.pdf [file c5ra02452h1.pdf]
